# Supplementary material for: Founder effects drive the genetic structure of passively dispersed aquatic invertebrates
Source: PeerJ journal article supplement (doi:10.7717/peerj.6094), 2018-12-11

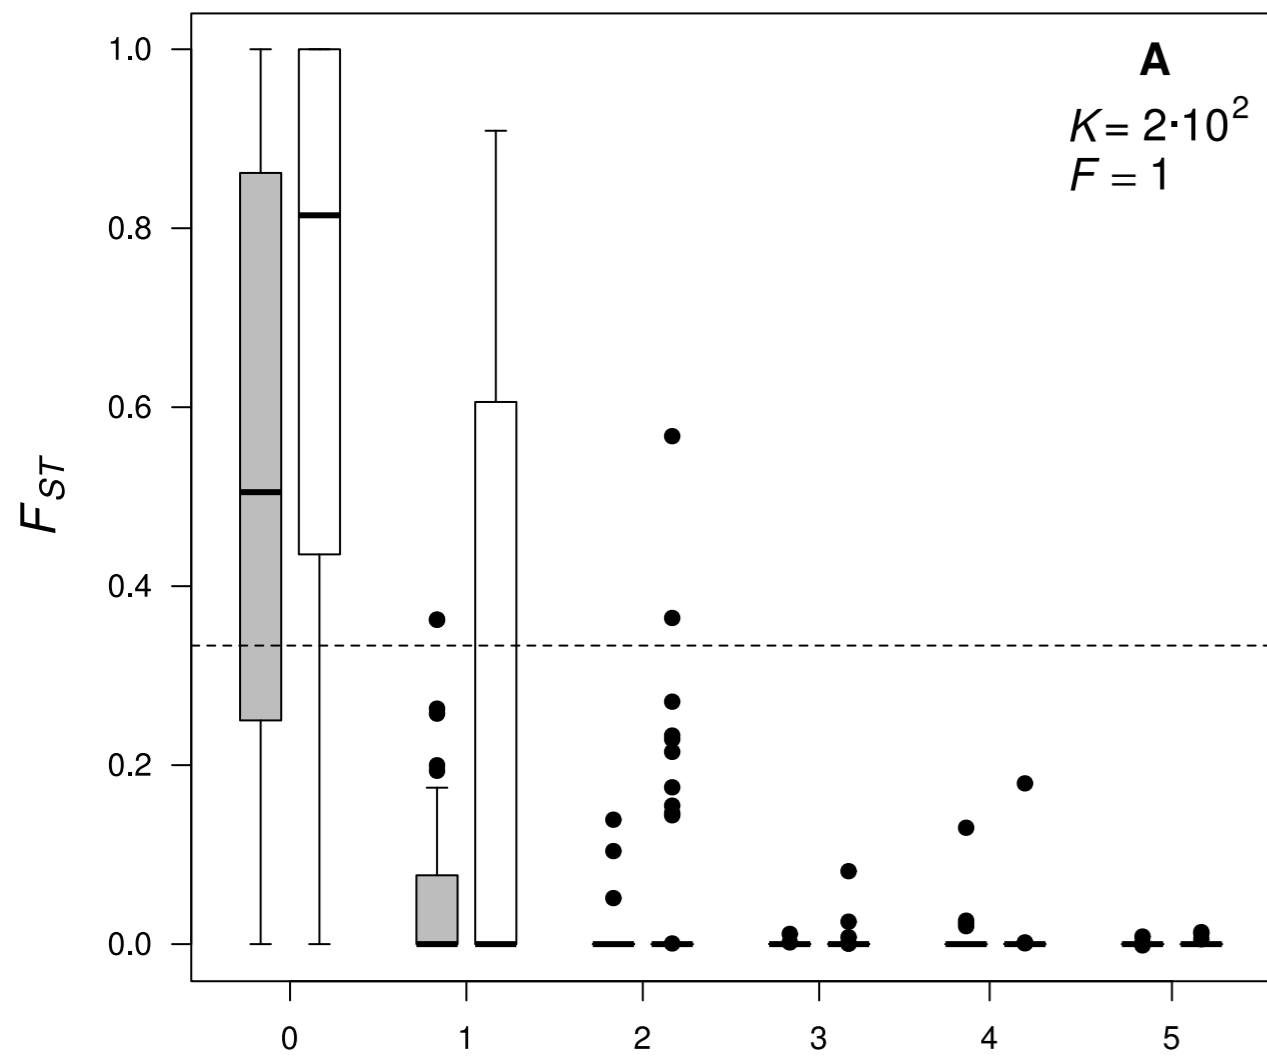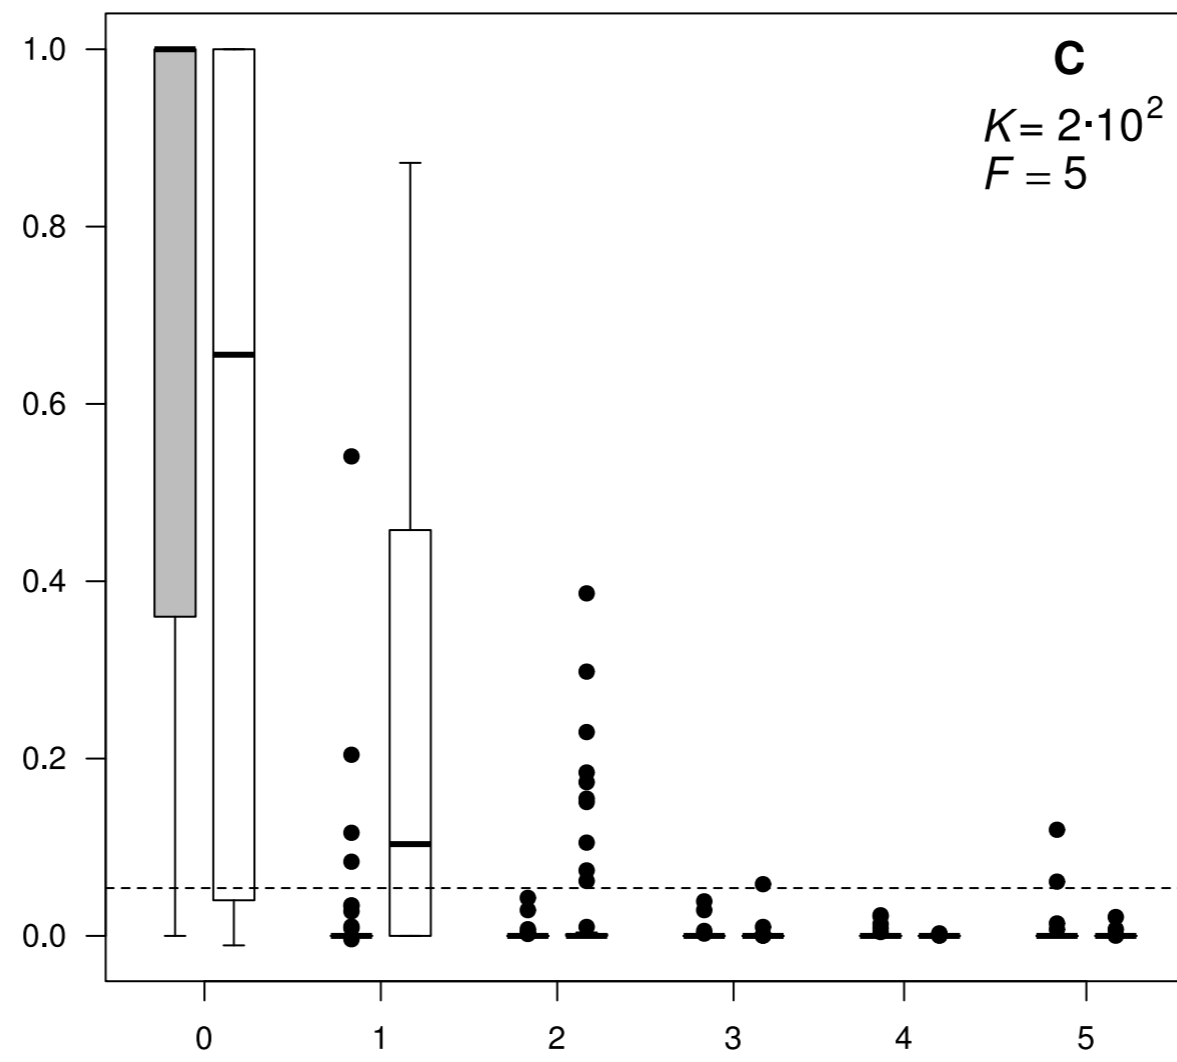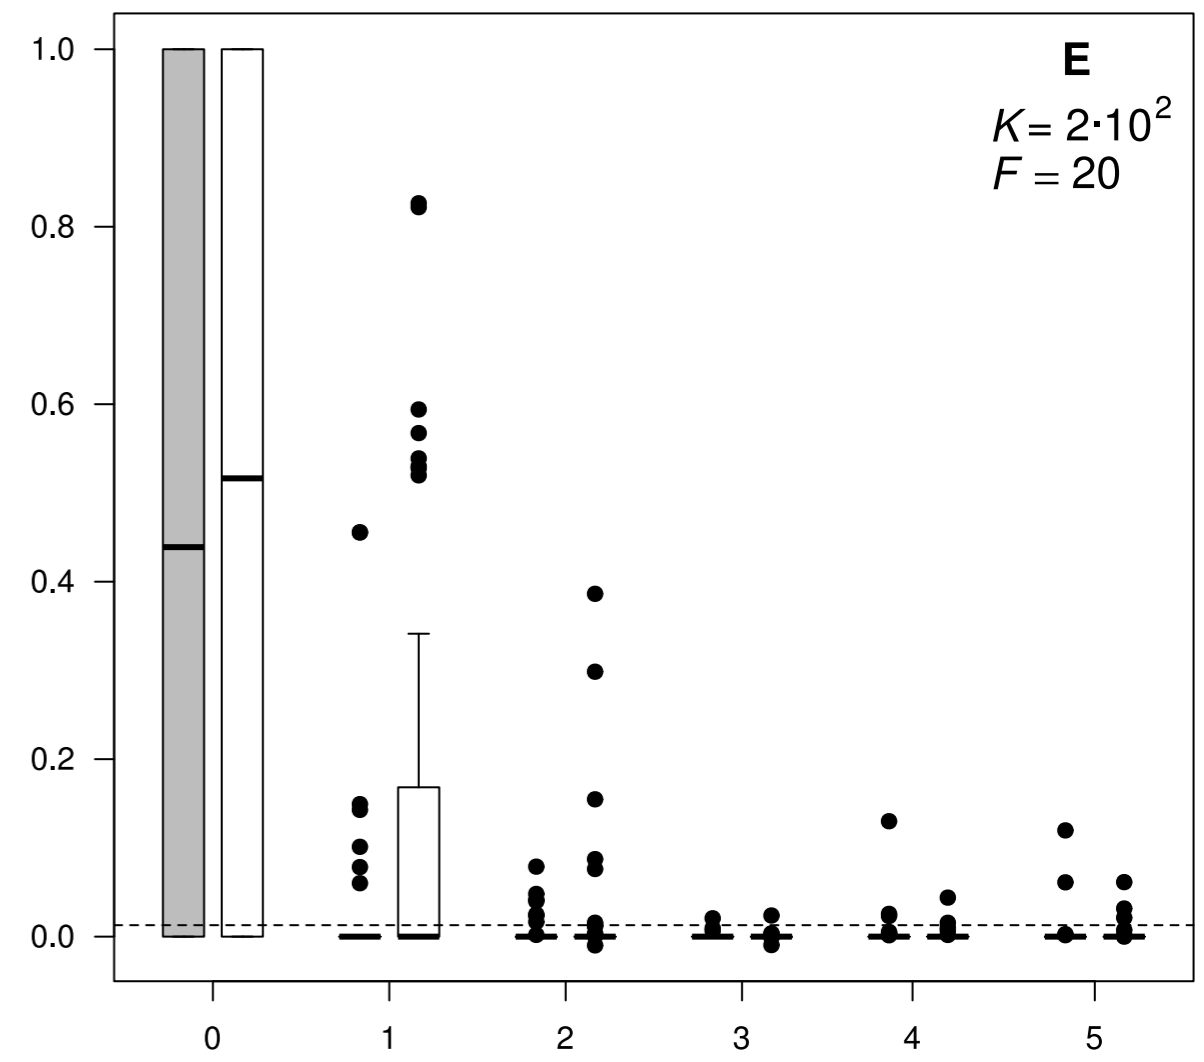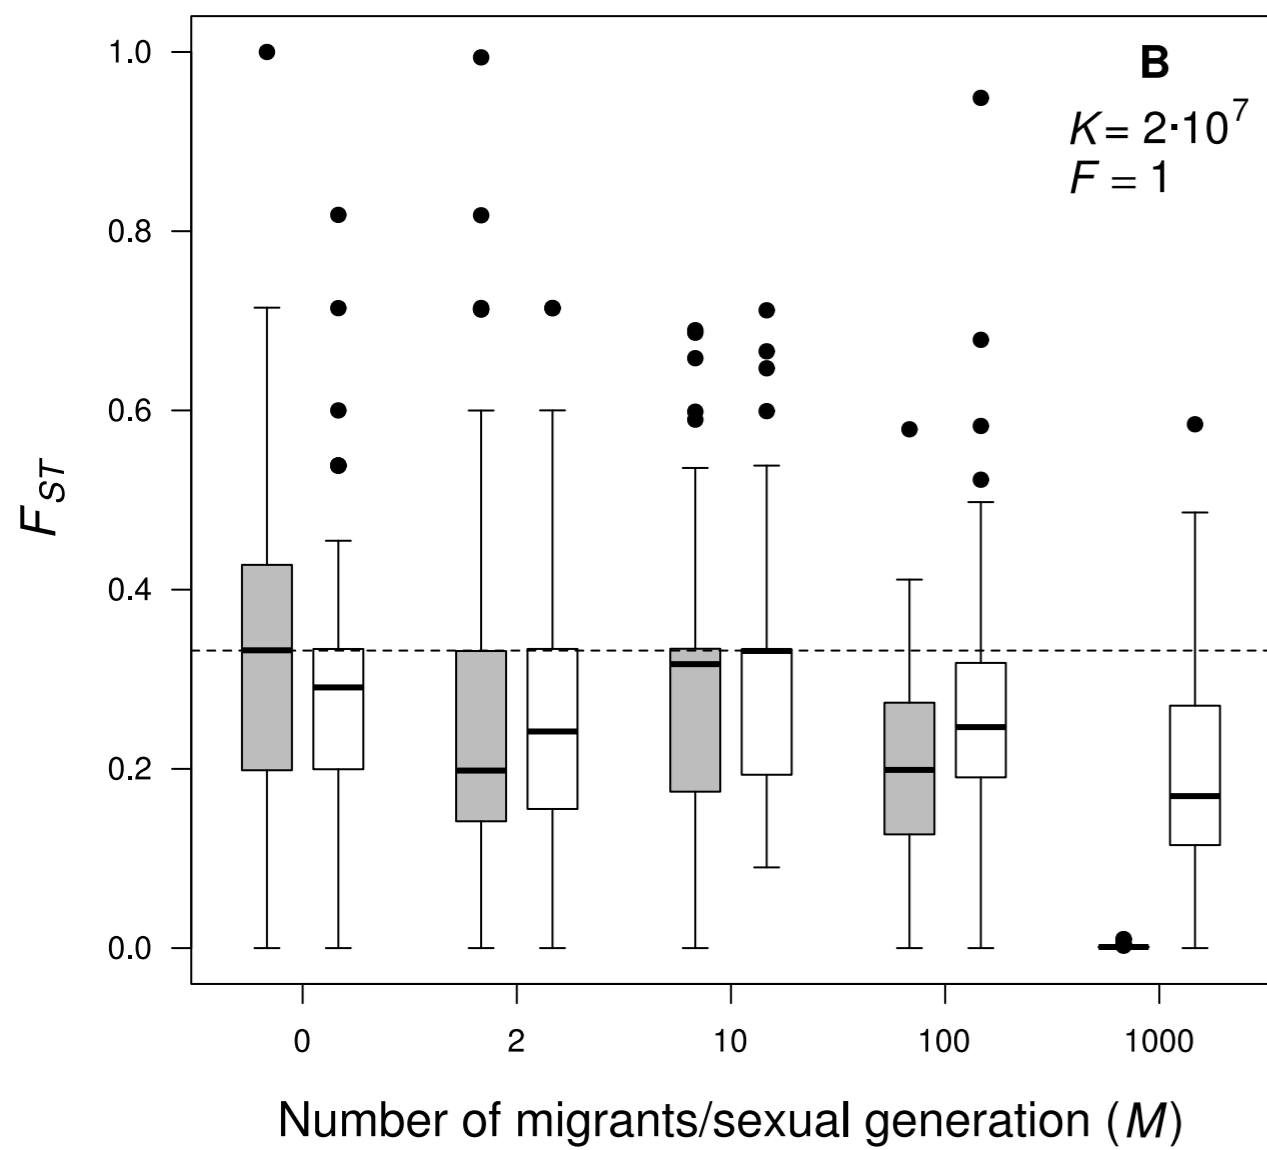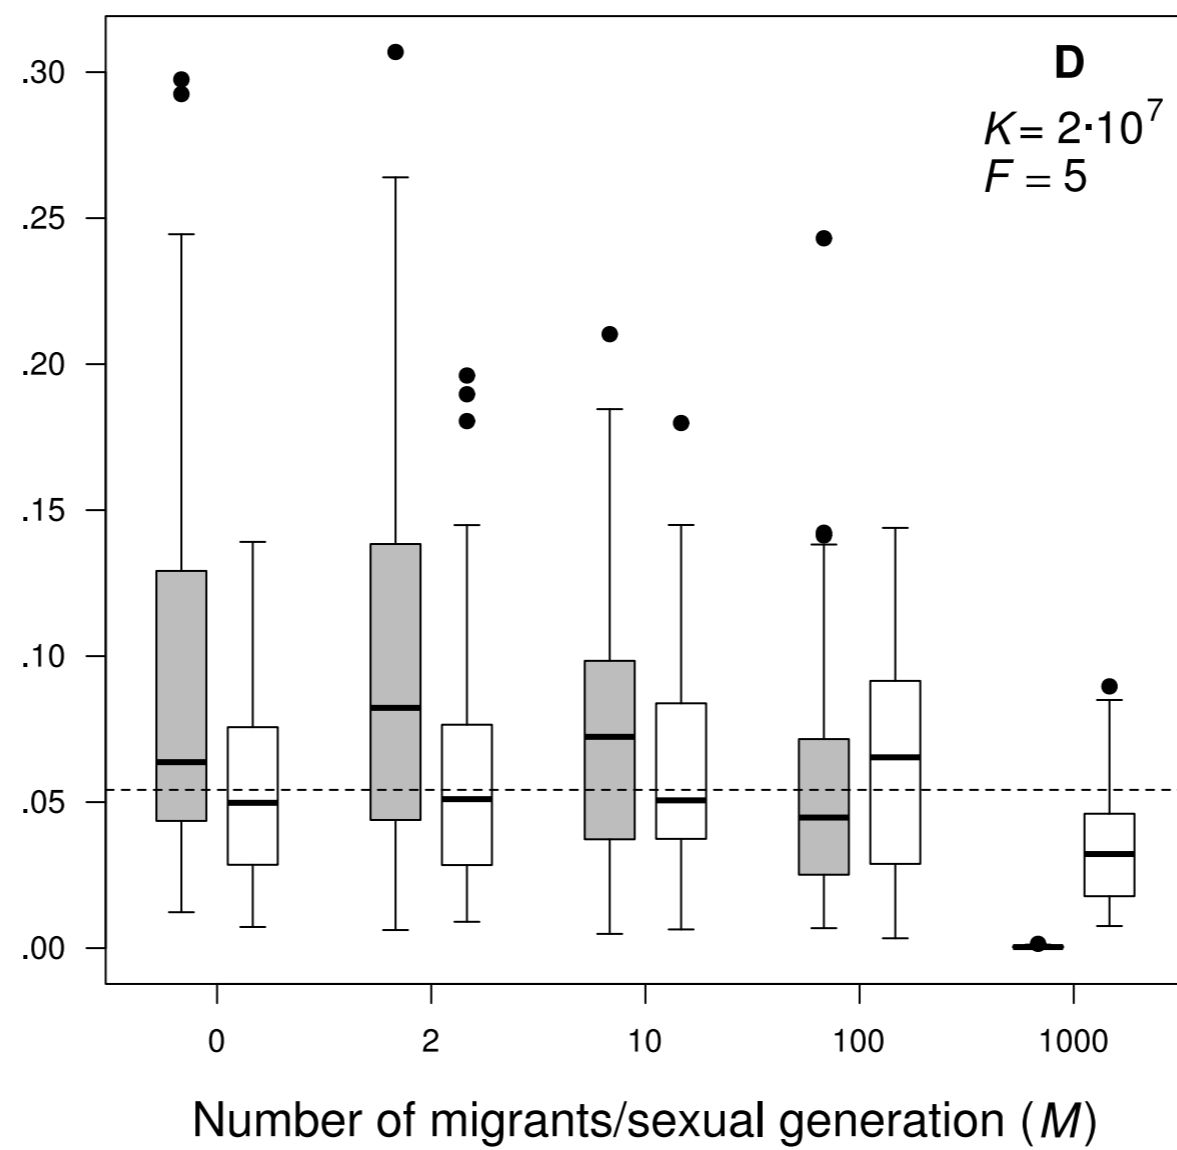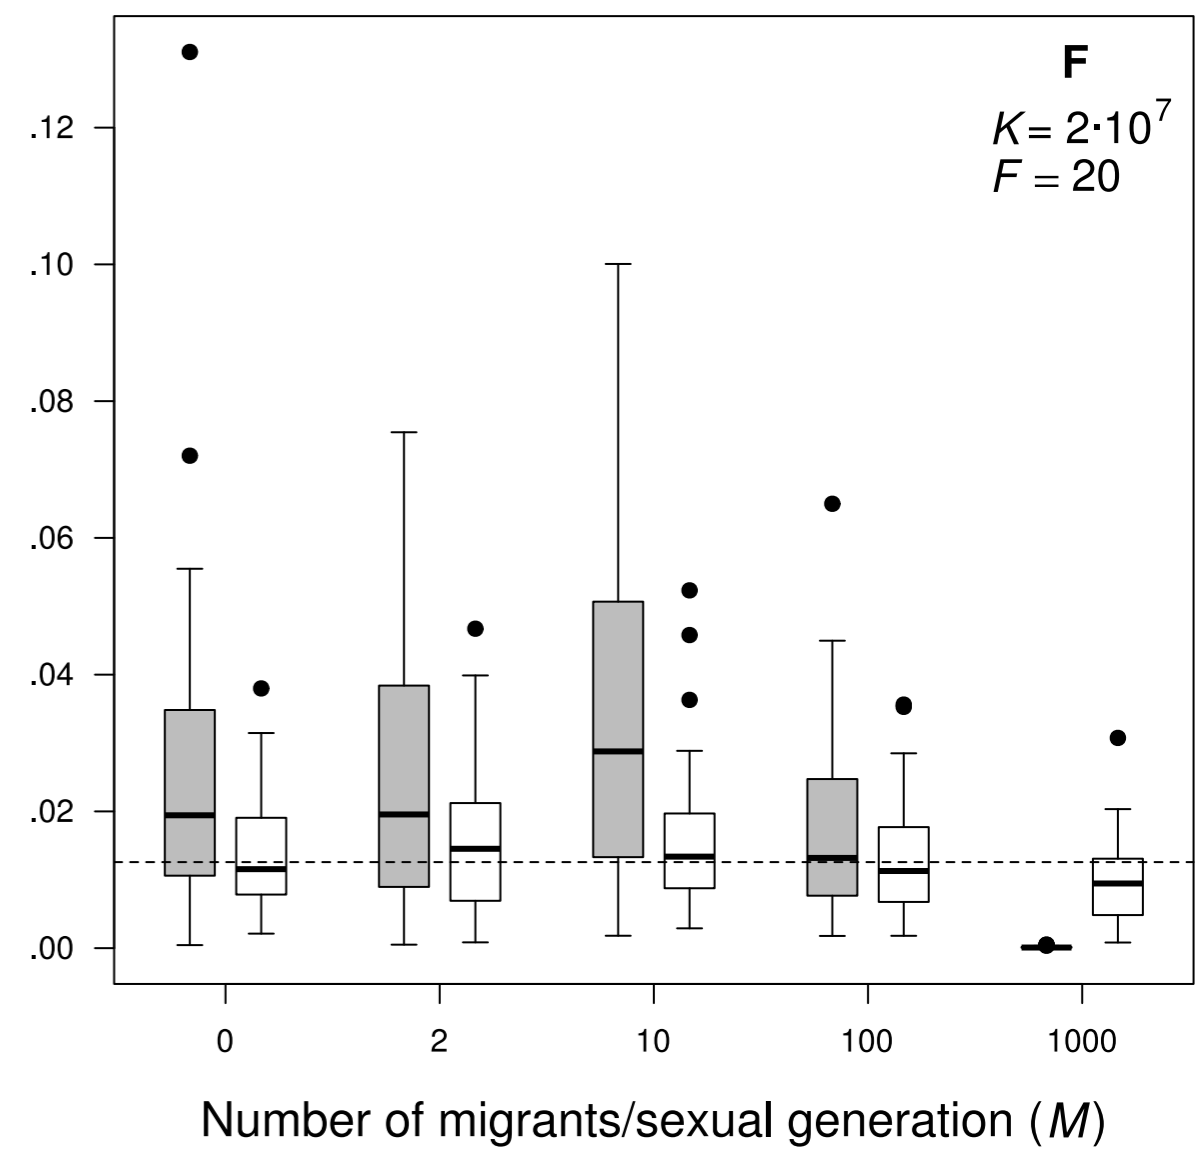

Supplement: several_founders.pdf [file several_founders.pdf]
